# Supplementary material
Source: PubMed Central journal article supplement (PMC4467460)
Supplement: NIHMS696577-supplement-Supplemental.pdf [file NIHMS696577-supplement-Supplemental.pdf]

**SUPPORTING INFORMATION** for “Host-Pathogen Interaction Profiling Using Self-Assembling Human Protein Arrays” by Yu, Decker, et al.

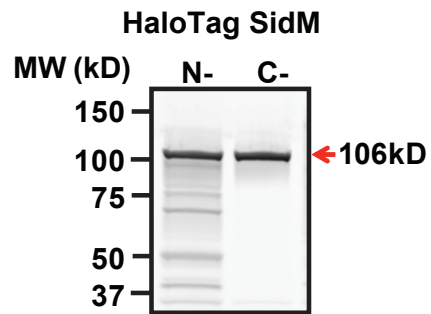

**Supplementary Figure S1.** Expression of N-terminal and C-terminal SidM HaloTag constructs using human HeLa cell-based expression system. 50ng/ $\mu$ L of plasmid DNA was employed and expression was executed at 30°C for 2 hr. 50-100  $\mu$ g/ml LidA and SidM were produced using human HeLa cell-based expression system and quantified using purified HaloTag protein as the standard.

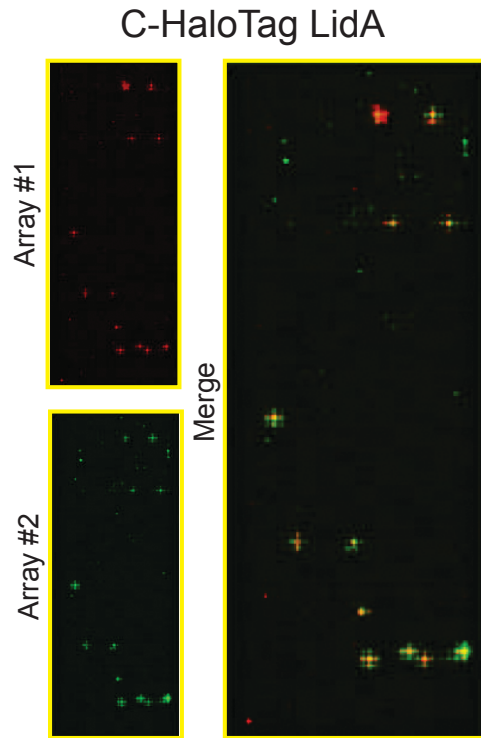

**Supplementary Figure S2.** Reproducibility of target detection by LidA in two independent experiments. The binding of HaloTag-LidA to identical NAPPA arrays was detected with Alexa660-labeled Halo-ligand in two independent experiments on different days. Protein slides were artificially colored red (day 1) and green (day 2) and merged in order to visualize the reproducibility of target candidate detection (yellow). The entire set of arrays yielded reproducible results; one representative array is shown here.

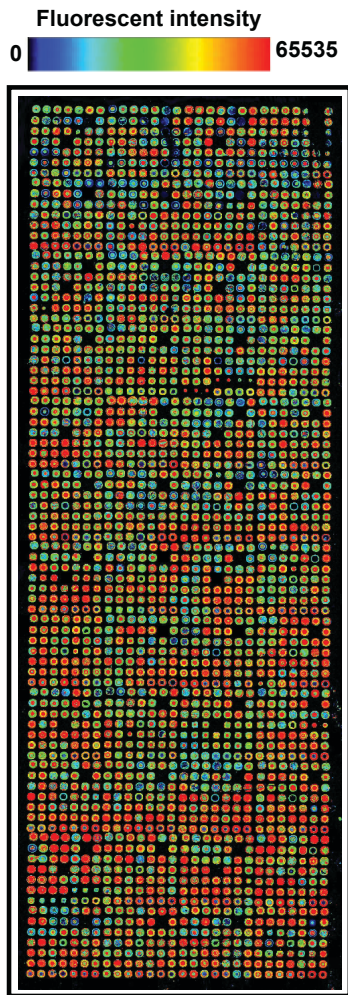

**Supplementary Figure S3.** Validation of bait protein capture on Nappa array. To confirm protein display on Nappa produced with the human HeLa cell-based expression system, we probed one of the arrays with anti-GST tag antibody followed by Tyramide Signal Amplification (PerkinElmer). The results, shown in the form of a heat map, indicate that the spot signals on the array were significantly increased over those on a control slide lacking T7 polymerase (not shown) suggesting that most of the human ORF clones were successfully transcribed, translated, and then captured on the array. The heat map indicates signal intensity ranging from blue (low) to red (high).

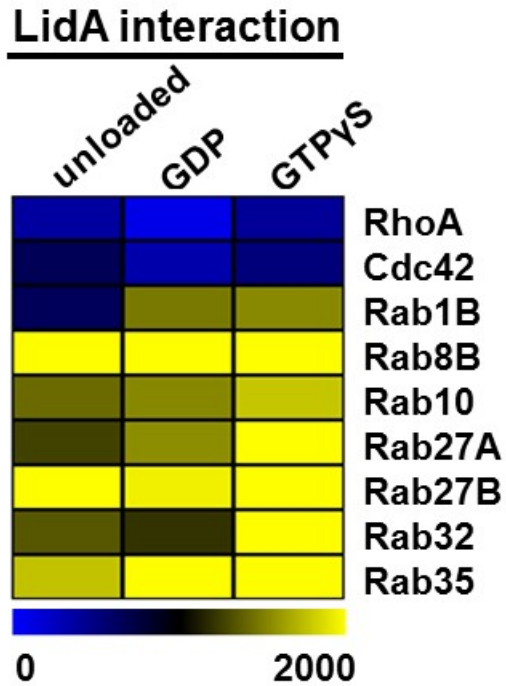

**Supplementary Figure S4.** To examine the effect of differential nucleotide binding on the GTPase targets, an array comprised of select Rab GTPases, plus the negative controls RhoA and Cdc42, was synthesized with HeLa cell-based IVTT. Spotted proteins were then stripped of nucleotide and left ‘unloaded’, or loaded with either GDP or GTP $\gamma$ S to render the Rab proteins inactive or active, respectively. Arrays were subjected to the PPI assay using LidA as bait. The results are shown in the form of a heat map indicating signal intensity ranging from blue (low) to yellow (high).

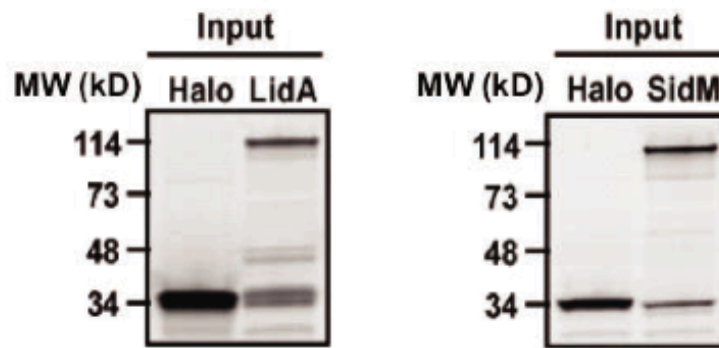

**Supplementary Figure S5.** Input of HaloTag protein, HaloTag-LidA and HaloTag-SidM used in the bead-based pull-down assay. 50ng/ $\mu$ L of plasmid DNA was employed and expression was performed at 30°C for 2 hr.

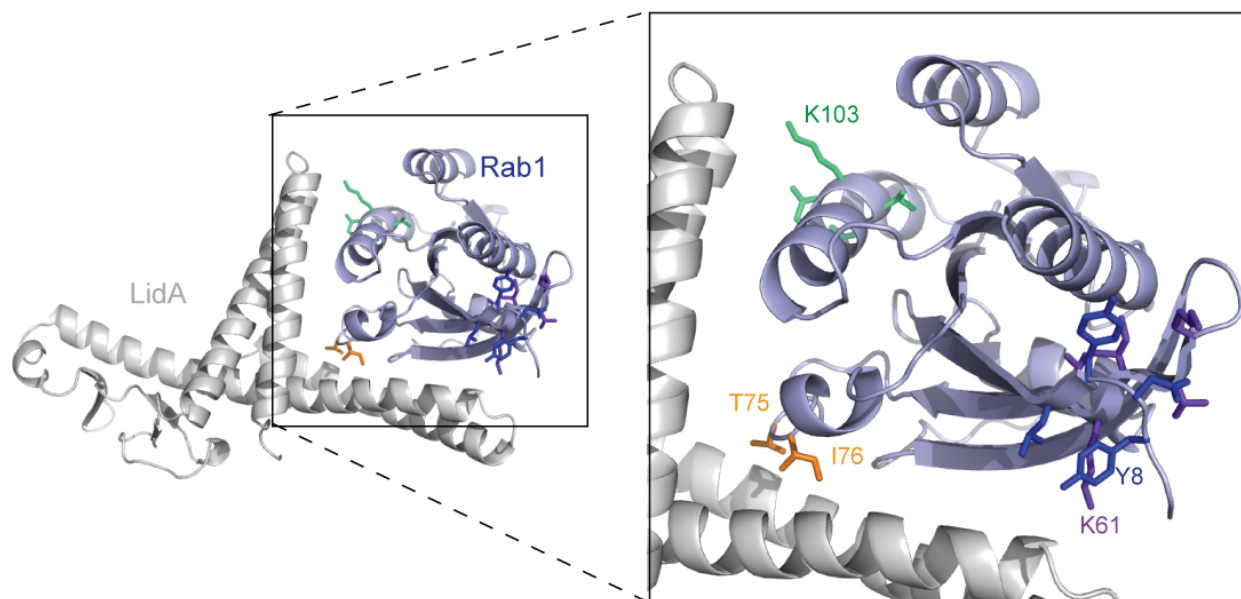

**Supplementary Figure S6.** Interface residues conserved within LidA-binding Rabs. (A) Cartoon illustration of Rab1(1-176, light blue) bound by LidA(224-599; light grey) (34). Residues Ile76 and Thr75 (cluster L3), Lys61 (L2), Tyr8 (L1), and Lys103 (L4) are shown as sticks. Note that all four clusters are located within or adjacent to the LidA-Rab1 interface. Figure generated using the PyMOL Molecular Graphics System, Schrödinger, LLC.

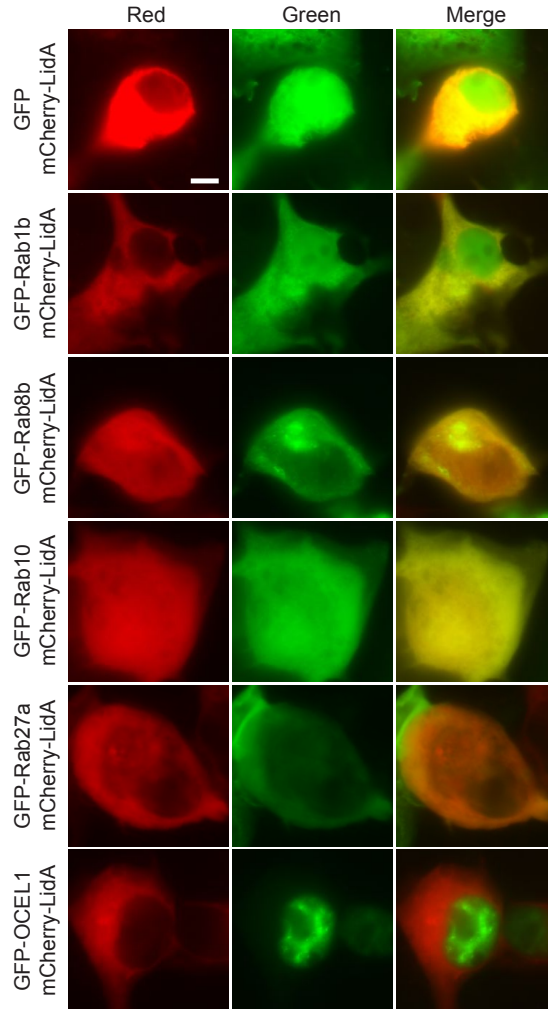

**Supplementary Figure S7.** Intracellular localization of exogenous mCherry-LidA. COS1 cells were transiently transfected with a plasmid encoding mCherry-LidA and GFP-tagged target candidates, and protein colocalization 16 hours after transfection was determined by fluorescence microscopy. Scale bar, 1 $\mu$ m. The broadly dispersed fluorescent signal for mCherry-LidA yielded inconclusive results for colocalization with selected host targets.





are shown in white. Rab27A is the only candidate lacking a tyrosine or equivalent residue available for AMPylation (serine, threonine) at that position. Instead, Rab27A contains a ten amino acid insertion (residues 52-61) not present in the other candidates that could provide an alternative site for AMPylation.
